# Supplementary material for: Evaluating parental perception and confidence managing obesity-related behaviors among children with severe early-onset obesity
Source: Research Square preprint supplement (doi:10.21203/rs.3.rs-4991867/v1), 2024-10-18
Supplement: Supplementary file 1 [file 282e507c97591ab2ba5d7b45.xlsx]

## Sheet: Table 2
Table 2. Comparisons of Problematic Behavior and Confidence scores between Children with and without Impaired Satiety from the LBC (n=89).
	Problem Scale							Confidence Scale
	Overall		Impaired Satiety		Not Impaired Satiety		Q-value	Overall		Impaired Satiety		Not Impaired Satiety		Q-value
	Mean	Ranking	Mean	Ranking	Mean	Ranking		Mean	Ranking	Mean	Ranking	Mean	Ranking
Eats too quickly	3.98±2.36	21	4.79±2.27	21	3.47±2.31	20	0.01*	6.68±3.24	2	6.15±3.36	2	7.00±3.20	2	0.34
Eats too much food	4.88±2.15	25	5.73±1.79	25	4.38±2.27	25	0.01*	6.32±2.98	1	5.97±3.04	1	6.54±2.98	1	0.49
Eats unhealthy snacks	4.19±2.13	23	5.73±1.93	25	3.82±2.14	24	0.04*	7.05±2.82	3	6.24±2.72	3	7.49±2.81	7	0.09
Grumbles or complains about food	3.8±2.38	19	4.33±2.32	18	3.40±2.34	18	0.05*	7.38±2.84	11	6.88±3.18	10	7.65±2.98	11	0.1
Yells about food	2.22±2.01	5	2.88±1.90	9	1.73±1.55	3	0.01*	8.49±2.45	25	8.16±2.40	23	8.69±2.52	25	0.07
Throws a tantrum about food	2.46±2.14	9	2.79±2.06	7	2.20±1.91	8	0.08	7.93±2.73	19	6.97±3.08	12	8.51±2.35	22	0.07
Refuses to eat certain foods	3.76±2.36	18	3.76±2.23	14	3.73±2.40	23	0.51	7.21±3.05	7	6.97±3.15	13	7.31±3.04	4	0.41
Argues about food	3.64±2.42	17	4.45±2.30	19	3.12±2.39	16	0.01*	7.12±3.07	6	6.45±2.94	5	7.51±3.14	8	0.14
Demands extra portions at meals	4.34±2.29	24	5.24±2.04	23	3.71±2.36	22	0.01*	7.07±2.82	4	6.52±2.84	6	7.42±2.80	5	0.21
Requests food continuously between meals	4.04±2.29	22	4.85±2.02	22	3.53±2.33	21	0.01*	7.21±2.84	7	6.85±2.71	8	7.45±2.94	6	0.3
Demands food when shopping or on outings	3.9±2.27	20	4.55±2.02	20	3.45±2.38	19	0.03*	7.57±2.70	13	7.33±2.41	17	7.73±2.91	12	0.23
Sneaks food when they know they are not supposed to	3.24±2.48	14	4.12±2.22	16	2.65±2.39	13	0.01*	7.50±3.04	12	6.52±3.17	7	8.16±2.81	17	0.07
Hides food	2.12±2.01	3	2.85±2.35	8	1.59±1.48	2	0.01*	8.14±2.94	22	7.47±3.06	18	8.61±2.81	24	0.07
Takes food	2.39±1.99	7	2.78±1.94	6	2.10±1.94	7	0.03*	8.05±2.86	20	7.68±2.64	20	8.31±3.01	19	0.13
Eats food to comfort themselves when feeling let down or depressed	2.23±2.04	6	2.19±1.55	2	2.23±2.14	9	0.23	8.12±2.82	21	8.41±2.66	25	7.96±2.95	15	0.78
Watches too much television	3.56±2.23	16	3.91±2.02	15	3.34±2.30	17	0.12	7.62±2.84	14	7.59±2.63	19	7.64±3.02	9	0.38
Spends too much time playing video or computer games	3.02±2.42	13	3.41±2.38	13	2.77±2.42	15	0.08	8.29±2.45	24	7.97±2.52	22	8.54±2.40	23	0.23
Complains about doing physical activity	3.36±2.49	15	4.31±2.40	17	2.72±2.31	14	0.01*	7.32±3.00	9	6.44±2.85	4	7.91±2.99	14	0.07
Refuses to do physical activity	2.73±2.27	12	3.22±2.40	12	2.38±2.10	12	0.1	7.33±3.22	10	6.88±2.65	9	7.64±3.27	10	0.38
Complains about being unfit or feeling low in energy	2.42±2.25	8	2.94±2.40	11	2.04±2.07	6	0.03*	7.89±2.99	17	7.10±3.17	14	8.32±2.82	20	0.09
Complains about being overweight	2.54±2.15	10	2.69±1.81	5	2.38±2.01	11	0.23	7.11±3.2	5	6.90±3.11	11	7.13±3.29	3	0.64
Complains about being teased	2.15±2.03	4	2.59±1.97	3	1.77±1.75	4	0.01*	7.80±3.10	15	7.26±3.26	16	8.17±2.99	18	0.22
Complains about not having enough friends	1.91±1.84	2	2.63±2.01	4	1.47±1.33	1	0.01*	7.89±3.08	17	7.23±3.23	15	8.43±2.78	21	0.1
Complains about being unattractive	1.85±1.66	1	1.94±1.31	1	1.79±1.64	5	0.7	8.14±2.80	22	8.32±2.39	24	8.09±3.01	16	0.7
Complains about not fitting into clothes	2.58±2.26	11	2.88±2.19	10	2.30±2.16	10	0.27	7.88±2.94	16	7.77±2.88	21	7.85±3.04	13	0.91
Subscale 1: Food Misbehaviors	22.19±15.45		26.79±15.09		19.59±14.21		<0.01*	53.32±19.90		49.14±20.53		55.77±19.65		0.09
Subscale 2: Overeating	29.00±17.87		34.25±15.85		25.52±18.12		<0.01*	58.52±23.3		55.43±22.83		60.57±23.60		0.09
Subscale 3: Emotional concerns about obesity	13.45±12.19		15.67±11.69		11.75±10.96		0.01*	46.71±18.11		44.58±18.04		47.99±17.93		0.09
Subscale 4: Physical activity concerns	12.67±9.41		14.85±9.20		11.21±9.13		0.02*	30.56±11.51		28.88±10.65		31.73±11.68		0.09
Total Problem scale	77.31±54.92		86.10±51.84		68.08±52.43		<0.01*a
Total Confidence scale								189.11±77.80		178.01±72.03		196.06±72.85		0.04*a
*Q/p-values < 0.05 were statistically significant
a p-values were calculated for total behavior and confidence scores
