# Supplementary material for: Evaluating parental perception and confidence managing obesity-related behaviors among children with severe early-onset obesity
Source: Research Square preprint supplement (doi:10.21203/rs.3.rs-4991867/v1), 2024-10-18
Supplement: Supplementary file 2 [file 87ab095cc5ea818dc0a7e527.xlsx]

## Sheet: Table 1
Table 1. Child, caregiver, and family demographic information (N=89) of the study sample.
Child Demographics
	Overall	Impaired Satiety		No Impaired Satiety
		N=35		N=52
	Mean (SD)
Child Age	7.32 (3.95)	7.99 (2.72)		6.96 (4.56)
Child BMI	32.54 (9.42)	33.66 (10.02)		31.79 (9.02)
Child BMI Percentile	98.75 (8.39)	99.81 (0.54)		97.98 (11.01)
Child BMI % of 95th Percentile	152.17 (41.33)	161.44 (37.12)		144.94 (43.41)
	N (%)
Sex
Female	46 (52%)	18 (51%)		27 (52%)
Male	43 (48%)	17 (49%)		25 (48%)
Race
Black/African American	18 (20%)	7 (20%)		9 (17%)
Hispanic/Latino	54 (61%)	20 (57%)		34 (65%)
White	26 (29%)	11 (31%)		15 (29%)
Other	2 (2%)	0 (0%)		1 (2%)
Caregiver Demographics
	Mean (SD)
Caregiver Age	36.80 (7.85)	36.94 (7.25)		36.58 (8.35)
Caregiver BMI	34.55 (10.04)	34.74 (10.80)		33.54 (8.48)
	N (%)
Caregiver Relationship
Mother	85 (96%)	33 (94%)		50 (96%)
Father	2 (2%)	2 (6%)		0 (0%)
Adopted Mother	1 (1%)	0 (0%)		1 (2%)
Adopted Father	0 (0%)	0 (0%)		0 (0%)
Other	1 (1%)	0 (0%)		1 (2%)
Race
Black/African American	16 (18%)	6 (17%)		8 (15%)
Hispanic/Latino	52 (58%)	20 (57%)		32 (62%)
White	25 (28%)	11 (31%)		14 (27%)
Other	1 (1%)	0 (0%)		1 (2%)
* p < 0.05 between satiety groups by t-test.
